# Supplementary material
Source: Frontiers journal article supplement (https://www.frontiersin.org/articles/307779)
Supplement: Table_2.pdf [file Table_2.pdf]

Table 2. Kendall's Tau Correlation Coefficients.

| Priming         | Sex    |                         |                         | X-1 (state)             | X-2 (trait) |       |
|-----------------|--------|-------------------------|-------------------------|-------------------------|-------------|-------|
| control         | Male   | Kendall Tau b           | Malice-Male             | Correlation coefficient | -.101       | .017  |
|                 |        |                         |                         | Sig. (1-tailed)         | .217        | .447  |
|                 |        |                         |                         | N                       | 38          | 38    |
|                 |        |                         | Malice-Female           | Correlation coefficient | .028        | -.158 |
|                 |        |                         |                         | Sig. (1-tailed)         | .412        | .112  |
|                 |        |                         |                         | N                       | 38          | 38    |
|                 |        | Humor- Male             | Correlation coefficient | -.245 <sup>*</sup>      | -.063       |       |
|                 |        |                         | Sig. (1-tailed)         | .030                    | .316        |       |
|                 |        |                         | N                       | 37                      | 37          |       |
|                 |        | Humor-Female            | Correlation coefficient | .251 <sup>*</sup>       | .187        |       |
|                 |        |                         | Sig. (1-tailed)         | .028                    | .079        |       |
|                 |        |                         | N                       | 37                      | 37          |       |
|                 | Female | Kendall Tau b           | Malice-Male             | Correlation coefficient | .057        | .064  |
|                 |        |                         |                         | Sig. (1-tailed)         | .301        | .281  |
|                 |        |                         |                         | N                       | 56          | 55    |
|                 |        |                         | Malice-Female           | Correlation coefficient | -.105       | -.060 |
| Sig. (1-tailed) |        |                         |                         | .165                    | .292        |       |
| N               |        |                         |                         | 56                      | 55          |       |
| Humor - Male    |        | Correlation coefficient | .012                    | .060                    |             |       |
|                 |        | Sig. (1-tailed)         | .453                    | .290                    |             |       |
|                 |        | N                       | 56                      | 55                      |             |       |
| Humor - female  |        | Correlation coefficient | .058                    | .016                    |             |       |
|                 |        | Sig. (1-tailed)         | .294                    | .442                    |             |       |
|                 |        | N                       | 56                      | 55                      |             |       |
| Negative        | Male   | Kendall Tau b           | Malice-Male             | Correlation coefficient | -.179       | -.026 |
|                 |        |                         |                         | Sig. (1-tailed)         | .098        | .426  |
|                 |        |                         |                         | N                       | 33          | 32    |
|                 |        |                         | Malice-Female           | Correlation coefficient | .206        | .138  |
|                 |        |                         |                         | Sig. (1-tailed)         | .067        | .163  |
|                 |        |                         |                         | N                       | 33          | 32    |
|                 |        | Humor - Male            | Correlation coefficient | .000                    | .020        |       |
|                 |        |                         | Sig. (1-tailed)         | .500                    | .444        |       |
|                 |        |                         | N                       | 32                      | 31          |       |
|                 |        | Humor-Female            | Correlation coefficient | .239 <sup>*</sup>       | .195        |       |
|                 |        |                         | Sig. (1-tailed)         | .047                    | .091        |       |
|                 |        |                         | N                       | 32                      | 31          |       |
|                 | Female | Kendall Tau b           | Malice-Male             | Correlation coefficient | .140        | .172  |
|                 |        |                         |                         | Sig. (1-tailed)         | .153        | .102  |
|                 |        |                         |                         | N                       | 35          | 35    |
|                 |        |                         | Malice-Female           | Correlation coefficient | .034        | .036  |
| Sig. (1-tailed) |        |                         |                         | .400                    | .395        |       |
| N               |        |                         |                         | 35                      | 35          |       |

|          |        |               |             |                         |        |         |
|----------|--------|---------------|-------------|-------------------------|--------|---------|
|          |        |               | Humor -     | Correlation coefficient | -,114  | -,171   |
|          |        |               | Male        | Sig. (1-tailed)         | ,203   | ,104    |
|          |        |               |             | N                       | 35     | 35      |
|          |        |               | Humor -     | Correlation coefficient | ,187   | ,063    |
|          |        |               | female      | Sig. (1-tailed)         | ,086   | ,320    |
|          |        |               |             | N                       | 35     | 35      |
| Positive | Male   | Kendall Tau b | Malice-Male | Correlation coefficient | .067   | -.075   |
|          |        |               |             | Sig. (1-tailed)         | .322   | .300    |
|          |        |               |             | N                       | 31     | 32      |
|          |        |               | Malice-     | Correlation coefficient | -.252* | -.238*  |
|          |        |               | Female      | Sig. (1-tailed)         | .041   | .048    |
|          |        |               |             | N                       | 31     | 32      |
|          |        |               | Humor -     | Correlation coefficient | .013   | .263*   |
|          |        |               | Male        | Sig. (1-tailed)         | .465   | .031    |
|          |        |               |             | N                       | 31     | 32      |
|          |        |               | Humor -     | Correlation coefficient | -.199  | -.223   |
|          |        |               | Female      | Sig. (1-tailed)         | .085   | .059    |
|          |        |               |             | N                       | 31     | 32      |
|          | Female | Kendall Tau b | Malice-Male | Correlation coefficient | .058   | .238*   |
|          |        |               |             | Sig. (1-tailed)         | .336   | .047    |
|          |        |               |             | N                       | 35     | 32      |
|          |        |               | Malice-     | Correlation coefficient | -.209  | -.461** |
|          |        |               | Female      | Sig. (1-tailed)         | .062   | .001    |
|          |        |               |             | N                       | 35     | 32      |
|          |        |               | Humor -     | Correlation coefficient | -.048  | .075    |
|          |        |               | Male        | Sig. (1-tailed)         | .364   | .301    |
|          |        |               |             | N                       | 35     | 32      |
|          |        |               | Humor -     | Correlation coefficient | .152   | .002    |
|          |        |               | Female      | Sig. (1-tailed)         | .132   | .493    |
|          |        |               |             | N                       | 35     | 32      |

\* p<.05 (1-tailed)

\*\* p<.001(1-tailed)
